# Supplementary material for: The Effects of Acute Physical Exercise on Memory, Peripheral BDNF, and Cortisol in Young Adults
Source: PubMed Central journal article supplement (PMC4942640; doi:10.1155/2016/6860573), 2016-06-29
Supplement: 6860573.f1.pdf [file 6860573.f1.pdf]

## Supplementary material

### Analyses including only women taking contraceptives and men

#### 1. Memory for newly learned vocabulary

Anova results:

Time  $F(1, 68) = 3.41, p = .069, \eta^2 = .048$

Group  $F(2, 68) = 2.23, p = .115, \eta^2 = .062$

Time x Group  $F(2, 68) = 4.09, p = .021, \eta^2 = .107$

Table 1. Descriptive statistics and contrast analysis for memory scores

|                                                    | high-intensity<br>group<br>N = 26 | low-intensity<br>group<br>N = 24 | relaxing<br>group<br>N = 21 | contrast analysis                                                                                                               |
|----------------------------------------------------|-----------------------------------|----------------------------------|-----------------------------|---------------------------------------------------------------------------------------------------------------------------------|
| Day 1<br>mean (SD)                                 | 3.88 (2.66)                       | 3.75 (2.56)                      | 5.67 (3.02)                 | high-intensity vs.<br>relaxing:<br>$t(68) = -2.22, p = .030$<br><br>low-intensity vs.<br>relaxing:<br>$t(68) = -2.34, p = .022$ |
| Day 2<br>mean (SD)                                 | 4.08 (2.33)                       | 3.58 (2.50)                      | 4.81 (3.12)                 | high-intensity vs.<br>relaxing:<br>$t(68) = -0.95, p = .348$<br><br>low-intensity vs.<br>relaxing:<br>$t(68) = -1.55, p = .125$ |
| Difference score<br>day 2 minus day 1<br>mean (SD) | .19 (1.10)                        | -.17 (1.40)                      | -.86 (1.28)                 | high-intensity vs.<br>relaxing:<br>$t(68) = 2.84, p = .006$<br><br>low-intensity vs.<br>relaxing:<br>$t(68) = 1.83, p = .071$   |

## 2. BDNF

Anova results:

Time  $F(2, 132) = 5.68, p = .004, \eta^2 = .079$

Group  $F(2, 66) = 1.86, p = .163, \eta^2 = .053$

Time x Group  $F(4, 132) = 16.35, p < .001, \eta^2 = .331$

Table 2. Descriptive statistics and contrast analysis for the increase in BDNF after exercising

|                                             | high-intensity<br>group<br>N = 26 | low-intensity<br>group<br>N = 21 | relaxing<br>group<br>N = 22 | contrast analysis                                                                                                             |
|---------------------------------------------|-----------------------------------|----------------------------------|-----------------------------|-------------------------------------------------------------------------------------------------------------------------------|
| Difference BDNF<br>t2 minus t0<br>mean (SD) | 2.93 (3.23)                       | -.72 (2.09)                      | -1.93 (2.60)                | high-intensity vs.<br>relaxing:<br>$t(66) = 6.15, p < .001$<br><br>low-intensity vs.<br>relaxing:<br>$t(66) = 1.45, p = .152$ |

## 3. Cortisol

Anova results:

Time  $F(3, 189) = 15.49, p < .001, \eta^2 = .197$

Group  $F(2, 63) = 0.39, p = .676, \eta^2 = .012$

Time x Group  $F(6, 189) = 5.29, p < .001, \eta^2 = .144$

Table 3. Descriptive statistics and contrast analysis for the increase in cortisol 20 min after exercising

|                                                  | high-intensity<br>group<br>N = 26 | low-intensity<br>group<br>N = 20 | relaxing<br>group<br>N = 20 | contrast analysis                                                                                                             |
|--------------------------------------------------|-----------------------------------|----------------------------------|-----------------------------|-------------------------------------------------------------------------------------------------------------------------------|
| Difference cortisol<br>t3 minus t0,<br>mean (SD) | 1.08 (4.22)                       | -1.47 (2.20)                     | -2.02 (2.00)                | high-intensity vs.<br>relaxing:<br>$t(63) = 3.35, p = .001$<br><br>low-intensity vs.<br>relaxing:<br>$t(63) = 0.56, p = .578$ |
